# Supplementary material for: Formation of pH-responsive drug-delivery systems by electrospinning of vesicle-templated nanocapsule solutions
Source: Royal Society of Chemistry journal article supplement (doi:10.1039/c5ra26866d), 2016-01-01
Supplement: c5ra26866d1.pdf [file c5ra26866d1.pdf]

## Formation of pH-responsive drug-delivery systems by electrospinning of vesicle-templated nanocapsules solutions

W. Li, \* X. N. Tan, T. Luo, X. Huang, Q. Wang, \* Y. J. Yang, M. J. Wang and L. F. Liu

### Electronic Supplementary Information

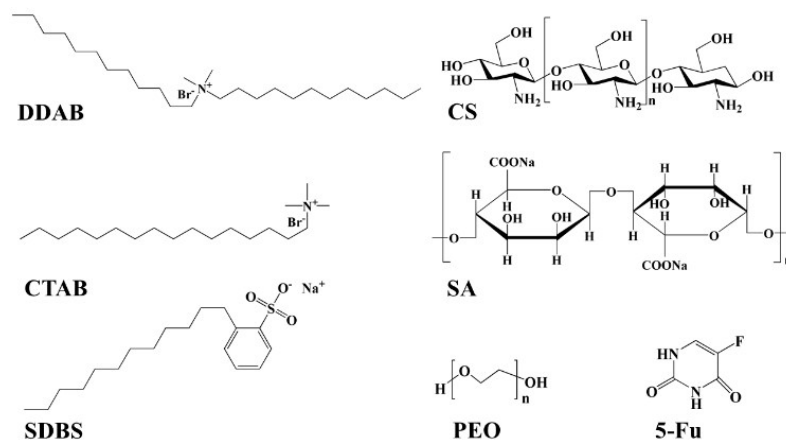

Scheme S1. Chemical formulas for main studied reagents in this paper.

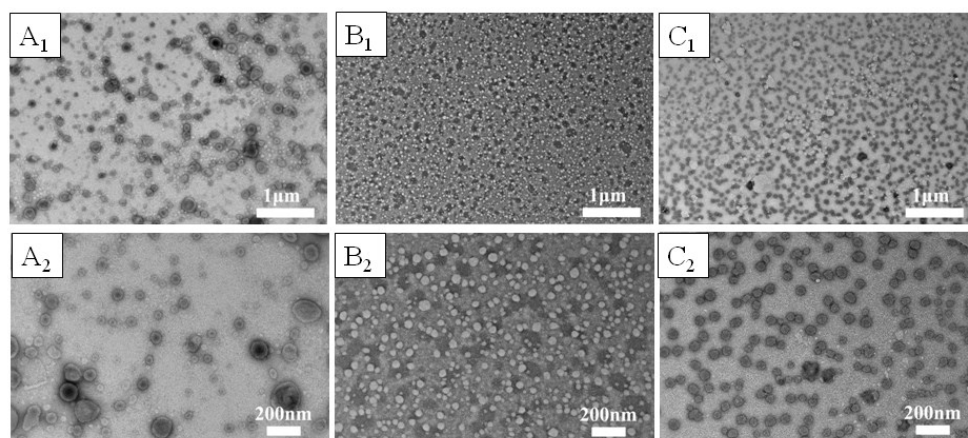

Fig. S1. TEM images of different vesicle systems: DDAB surfactant system (1000  $\mu\text{L}$  of 10 mM DDAB dispersed in 10 mL  $\text{H}_2\text{O}$ ,  $\text{A}_1$  and  $\text{A}_2$ ); CTAB/SDBS (7/3) surfactant system ( $c_{\text{total}}=10$  mM, 1000 $\mu\text{L}$  of 10 mM surfactant solution dispersed in 10 mL  $\text{H}_2\text{O}$ ,  $\text{B}_1$  and  $\text{B}_2$ ); (3) CTAB/SDBS (3/7) surfactant system ( $c_{\text{total}}=10$  mM, 1000 $\mu\text{L}$  of 10 mM surfactant solution dispersed in 10 mL  $\text{H}_2\text{O}$ ,  $\text{C}_1$  and  $\text{C}_2$ ).

According to TEM images in Fig. S1, the vesicles of each system are monodisperse enough (vesicles of CTAB/SDBS (7/3) is the most monodisperse) and the mean size of vesicles is 60 nm, 40nm and 45nm for DDAB, CTAB/SDBS (7/3) and CTAB/SDBS (3/7) surfactant system, respectively, corresponding to the average size of nanocapsules with vesicles as template.
